# Supplementary material for: Molecular typing of Streptococcus suis strains isolated from diseased and healthy pigs between 1996-2016
Source: PLOS journal article supplement (doi:10.1371/journal.pone.0210801), 2019-01-17
Supplement: S3 (10.1371/journal.pone.0210801.s003) [file journal.pone.0210801.s003]

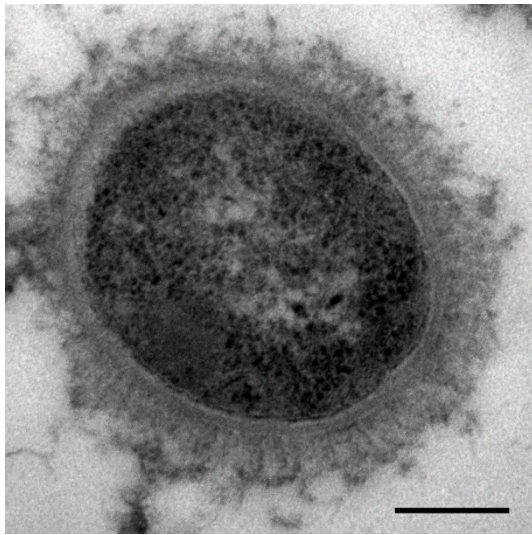

**A** 2016/04646/02/05

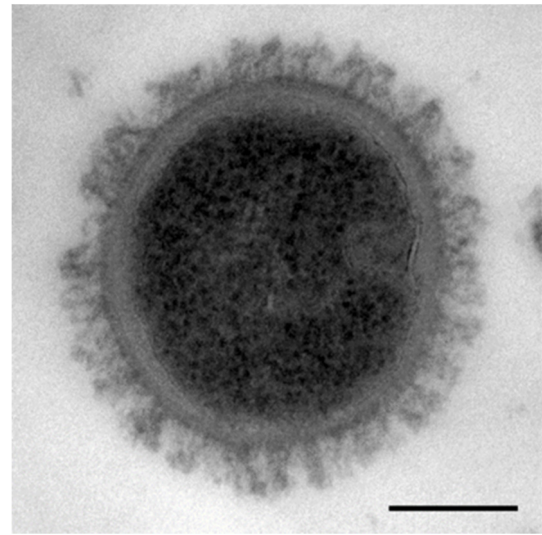

**B** 2016/01183/05/05

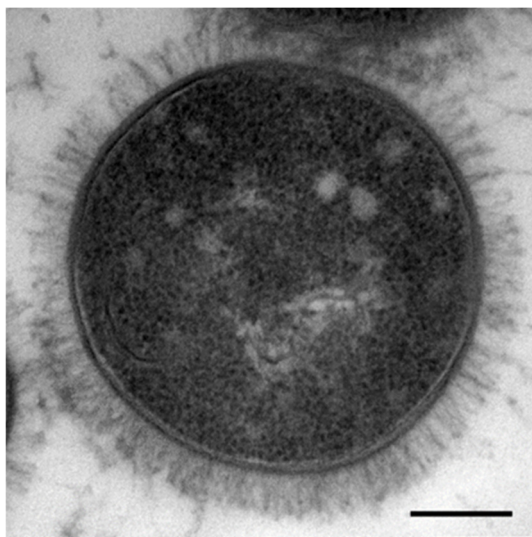

**C** 2016/00037/10/10

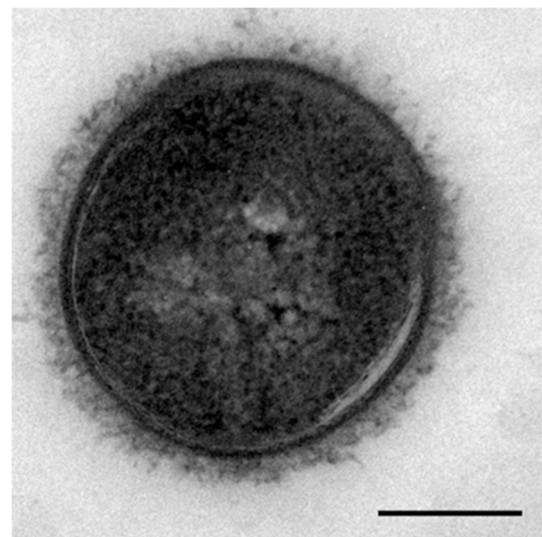

**D** 2015/03487/01/01

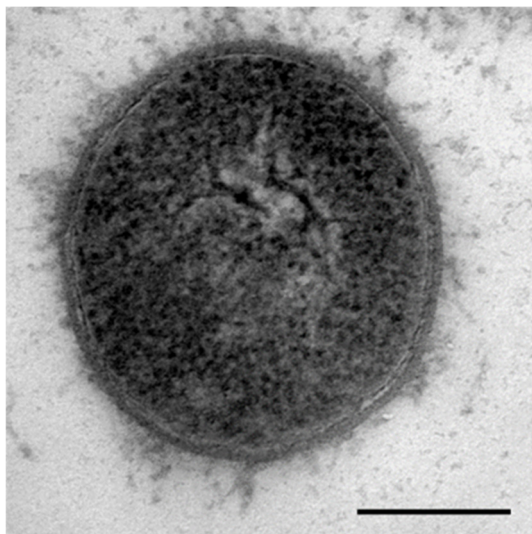

**E** 2016/03829/04/12

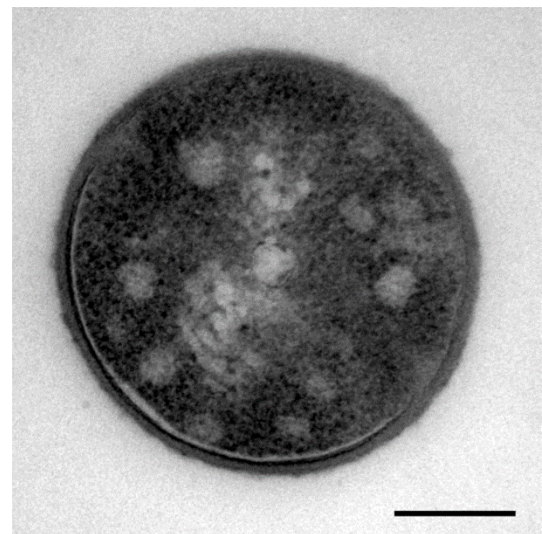

**F** 2016/03188/04/17

**S3 Fig. TEM images of non-typable *S. suis* isolates** representing an isolate with a well expressed capsule (A), a moderately well expressed capsule (B and C), a defective capsule (D), a very defective capsule (E) and no capsule (F). For details s. supporting information S6 Table. The scale corresponds to 0.2  $\mu$ m.
