# Supplementary material for: Molecular typing of Streptococcus suis strains isolated from diseased and healthy pigs between 1996-2016
Source: PLOS journal article supplement (doi:10.1371/journal.pone.0210801), 2019-01-17
Supplement: S6 (10.1371/journal.pone.0210801.s006) [file journal.pone.0210801.s006]

**S3 Table. Serotypes of German invasive *S. suis* isolates based on *cps* typing in collection A (1996-2004) and collection B (2015-2016), respectively, grouped by origin of isolation**

| <i>cps</i> type | Collection A     |       |                    | Collection B     |       |                    |
|-----------------|------------------|-------|--------------------|------------------|-------|--------------------|
|                 | CNS <sup>b</sup> | joint | other <sup>c</sup> | CNS <sup>b</sup> | joint | other <sup>c</sup> |
| 1 and 14        | 4*               | 3     | 1                  | 4*†††            | 17††† | 3                  |
| 2 and 1/2       | 25***            | 5     | 1                  | 56***            | 17    | 10                 |
| 3               | 2                | 0     | 0                  | 14†              | 0†    | 1                  |
| 4               | 1                | 0     | 1                  | 27††             | 1††   | 5                  |
| 5               | 1                | 0     | 1                  | 6                | 1     | 0                  |
| 6               | 0                | 0     | 0                  | 0                | 0     | 0                  |
| 7               | 3                | 1     | 1                  | 36               | 14    | 4                  |
| 8               | 0                | 0     | 0                  | 8                | 2     | 0                  |
| 9               | 12               | 1     | 5                  | 57               | 13    | 9                  |
| 10              | 0                | 0     | 0                  | 3                | 0     | 0                  |
| 11              | 0                | 0     | 0                  | 1                | 1     | 2                  |
| 12              | 0                | 0     | 0                  | 0                | 0     | 0                  |
| 13              | 0                | 0     | 0                  | 1                | 0     | 0                  |
| 15              | 0                | 0     | 0                  | 3                | 0     | 0                  |
| 16              | 0                | 0     | 0                  | 1                | 1     | 1                  |
| 17              | 0                | 0     | 0                  | 0                | 0     | 0                  |
| 18              | 0                | 0     | 0                  | 4                | 1     | 0                  |
| 19              | 0                | 0     | 0                  | 3                | 0     | 0                  |
| 20              | 0                | 0     | 0                  | 0                | 0     | 0                  |
| 21              | 0                | 0     | 0                  | 0                | 1     | 0                  |
| 22              | 0                | 0     | 0                  | 0                | 0     | 0                  |
| 23              | 0                | 0     | 0                  | 3                | 0     | 0                  |
| 24              | 0                | 0     | 0                  | 1                | 0     | 1                  |
| 25              | 0                | 0     | 0                  | 0                | 0     | 0                  |
| 26              | 0                | 0     | 0                  | 0                | 0     | 0                  |
| 27              | 0                | 0     | 0                  | 0                | 0     | 0                  |
| 28              | 0                | 0     | 0                  | 4                | 0     | 1                  |
| 29              | 0                | 0     | 0                  | 0                | 0     | 0                  |
| 30              | 0                | 0     | 0                  | 1                | 0     | 0                  |
| 31              | 0                | 0     | 0                  | 5                | 0     | 2                  |
| 32              | 0                | 0     | 0                  | 0                | 0     | 0                  |
| 33              | 0                | 0     | 0                  | 0                | 0     | 0                  |
| 34              | 0                | 0     | 0                  | 0                | 0     | 0                  |
| nt <sup>a</sup> | 0                | 2     | 0                  | 3                | 2     | 3                  |
| Σ               | 48               | 12    | 10                 | 241              | 71    | 41                 |

<sup>a</sup> nt: genetically non-typable by PCR

<sup>b</sup> CNS: central nervous system

<sup>c</sup> Other: internal organs other than lungs

\*  $0.01 < p \leq 0.05$  significant difference between collection A and B or <sup>†</sup> within collection B between CNS and joint isolates

<sup>††</sup>  $0.001 < p \leq 0.01$  very significant difference within collection B between CNS and joint isolates

<sup>\*\*\*</sup>  $p \leq 0.001$  highly significant difference between collection A and B or <sup>†††</sup> within collection B between CNS and joint isolates
